# Supplementary material for: Heterogeneity in Lowe Syndrome: Mutations Affecting the Phosphatase Domain of OCRL1 Differ in Impact on Enzymatic Activity and Severity of Cellular Phenotypes
Source: Biomolecules. 2023 Mar 29;13(4):615. doi: 10.3390/biom13040615 (PMC10135975; doi:10.3390/biom13040615)
Supplement: Supplementary file 1 [file biomolecules-13-00615-s001.zip › Supplemental Table SI_OCRL1 Variants Complete Pathogenecity Results.xlsx]

## Sheet: OCRL1 Variants
OCRL1 Protein change (p.)	H524R	K293E	M299I	R318H	I393F	D431N	D451G	V508D	Y513C	I533T
HGVS identifier	NM_000276.4(OCRL):c.1571A>G	NM_000276.4(OCRL):c.877A>G	NM_000276.4(OCRL):c.897G>A	NM_000276.4(OCRL):c.953G>A	NM_000276.4(OCRL):c.1177A>T	NM_000276.4(OCRL):c.1291G>A	NM_000276.4(OCRL):c.1352A>G	NM_000276.4(OCRL):c.1523T>A	NM_000276.4(OCRL):c.1538A>G	NM_000276.4(OCRL):c.1598T>C
Genomic coordinates (GRCh38)	chrX-129569368-A-G	chrX-129561231-A-G	chrX-129561251-G-A	chrX-129562397-G-A	chrX-129562719-A-T	chrX-129565818-G-A	chrX-129565879-A-G	chrX-129569320-T-A	chrX-129569335-A-G	chrX-129569395-T-C
Previously reported disease association	Lowe Syndrome	Dent-2 disease	Not specified	Dent-2 disease	Dent-2 disease	Not specified	Lowe Syndrome	Lowe Syndrome	Lowe Syndrome	Dent-2 disease
ClinVar Significance; Associated condition	Likely Pathogenic; Lowe Syndrome	NA	Benign; Nephrolithiasis, inborn genetic disease, Lowe Syndrome	Pathogenic; Lowe Syndrome	NA	Benign/Likely benign; Nephrolithiasis, inborn genetic disease, Lowe Syndrome	Not provided; Lowe Syndrome	Not provided; Lowe Syndrome	Not provided; Lowe Syndrome	Pathogenic; Dent 2 disease
gnomAD frequency (v2.1.1)	0	0	1436/205365 (Het), 375/205365 (Hemi)	0	0	116/204994 (Het), 37/204994 (Hemi)	0	0	0	0
MetaDome score and missense change tolerance	0.23, Intolerant	0.12, Highly Intolerant	0.21, Intolerant	0.21, Intolerant	0.37, Intolerant	0.41, Intolerant	0.13, Highly Intolerant	0.37, Intolerant	0.45, Intolerant	0.17, Highly Intolerant
REVEL	0.958	0.846	0.124	0.957	0.961	0.331	0.957	0.95	0.97	0.88
CADD	25.2	26	21.5	26.8	26	24	27	27.2	27.7	22.7
MutPred2	0.892	0.783	0.083	0.734	0.902	0.418	0.908	0.817	0.864	0.892
MutationTaster 2021	Deleterious	Deleterious	Benign	Deleterious	Deleterious	Benign	Deleterious	Deleterious	Deleterious	Deleterious
PolyPhen2	0.892, Probably damaging	0.957, Probably damaging	0, Benign	0.99, Probably damaging	0.998, Probably damaging	0.33, Benign	1, Probably damaging	0.997, Probably damaging	1, Probably damaging	0.999, Possibly damaging
SIFT	0.00, Deleterious	0.02, Deleterious	0.13, Tolerated	0.01, Deleterious	0.00, Deleterious	0.25, Tolerated	0.00, Deleterious	0.00, Deleterious	0.00, Deleterious	0.01, Deleterious
Site Directed Mutator (Predicted ΔΔG, predicted change in stability)	-1.58, reduced	0.99	0.11, increased	-1.3	-0.94, reduced	-0.25, reduced	-1.14, reduced	-3.53, reduced	-1.13, reduced	-3.29, reduced
	H524R is used as positive control for a verified pathogenic variant

## Sheet: Description of Utilized Tools
Mutpred2	The output of MutPred2 consists of a general score (g), i.e., the probability that the amino acid substitution is pathogenic. This score is the average of the scores from all neural networks in MutPred2. If interpreted as a probability, a score threshold of 0.50 would suggest pathogenicity. However, previous experience suggests that a threshold of 0.68 yields a false positive rate (fpr) of 10% an…
SIFT	SIFT predicts whether an amino acid substitution affects protein function based on sequence homology and the physical properties of amino acids. SIFT can be applied to naturally occurring nonsynonymous polymorphisms and laboratory-induced missense mutations. Briefly, SIFT takes a query sequence and uses multiple alignment information to predict tolerated and deleterious substitutions for every po…
PolyPhen2	PolyPhen-2 predicts the effect of an amino acid substitution on the structure and function of a protein using sequence homology, Pfam annotations, 3D structures from PDB where available, and a number of other databases and tools (including DSSP, ncoils etc.). Outputs consist of a qualitative prediction (one of 'probably damaging', 'possibly damaging', 'benign' or 'unknown') and a score. The PolyP…
REVEL	REVEL was trained using recently discovered pathogenic and rare neutral missense variants, excluding those previously used to train its constituent tools. The REVEL score for an individual missense variant can range from 0 to 1, with higher scores reflecting greater likelihood that the variant is disease-causing.
CADD	CADD ranks the deleteriousness of single nucleotide variants as well as insertion/deletions variants in the human genome.
